# Supplementary material for: Concurrent Tissue and Circulating Tumor DNA Molecular Profiling to Detect Guideline-Based Targeted Mutations in a Multicancer Cohort
Source: PubMed Central journal article supplement — JAMA Netw Open. 2024 Jan 22;7(1):e2351700. doi: 10.1001/jamanetworkopen.2023.51700 (PMC10804266; doi:10.1001/jamanetworkopen.2023.51700), 2024-01-22
Supplement: jamanetwopen-e2351700-s002.pdf [file jamanetwopen-e2351700-s002.pdf]

## Data Sharing Statement

Iams. Concurrent Tissue and Circulating Tumor DNA Molecular Profiling to Detect Guideline-Based Targeted Mutations in a Multicancer Cohort. *JAMA Netw Open*. Published January 22, 2024. doi:10.1001/jamanetworkopen.2023.51700

### Data

**Data available:** Yes

**Data types:** Deidentified participant data

**How to access data:** Data used in the research was collected in a real-world health care setting and is subject to controlled access for privacy and proprietary reasons. When possible, derived data supporting the findings of this study have been made available within the paper and its Supplementary Figures/Tables.

**When available:** With publication

### Supporting Documents

**Document types:** None

### Additional Information

**Who can access the data:** Tempus will make access to de-identified data available pending a signed data use agreement.

**Types of analyses:** De-identified data will be made available for the purposes of peer review and validation.

**Mechanisms of data availability:** Requests for access should be sent to [publication.inquiry@tempus.com](mailto:publication.inquiry@tempus.com) and will be responded to promptly.
